# Supplementary material
Source: publisher site journal article supplement (https://www.dovepress.com/article/603395)
Supplement: Supplementary file 1 [file Supplementary%20Materials.docx]

**Supplementary Materials**

**Supplementary Figures**

**
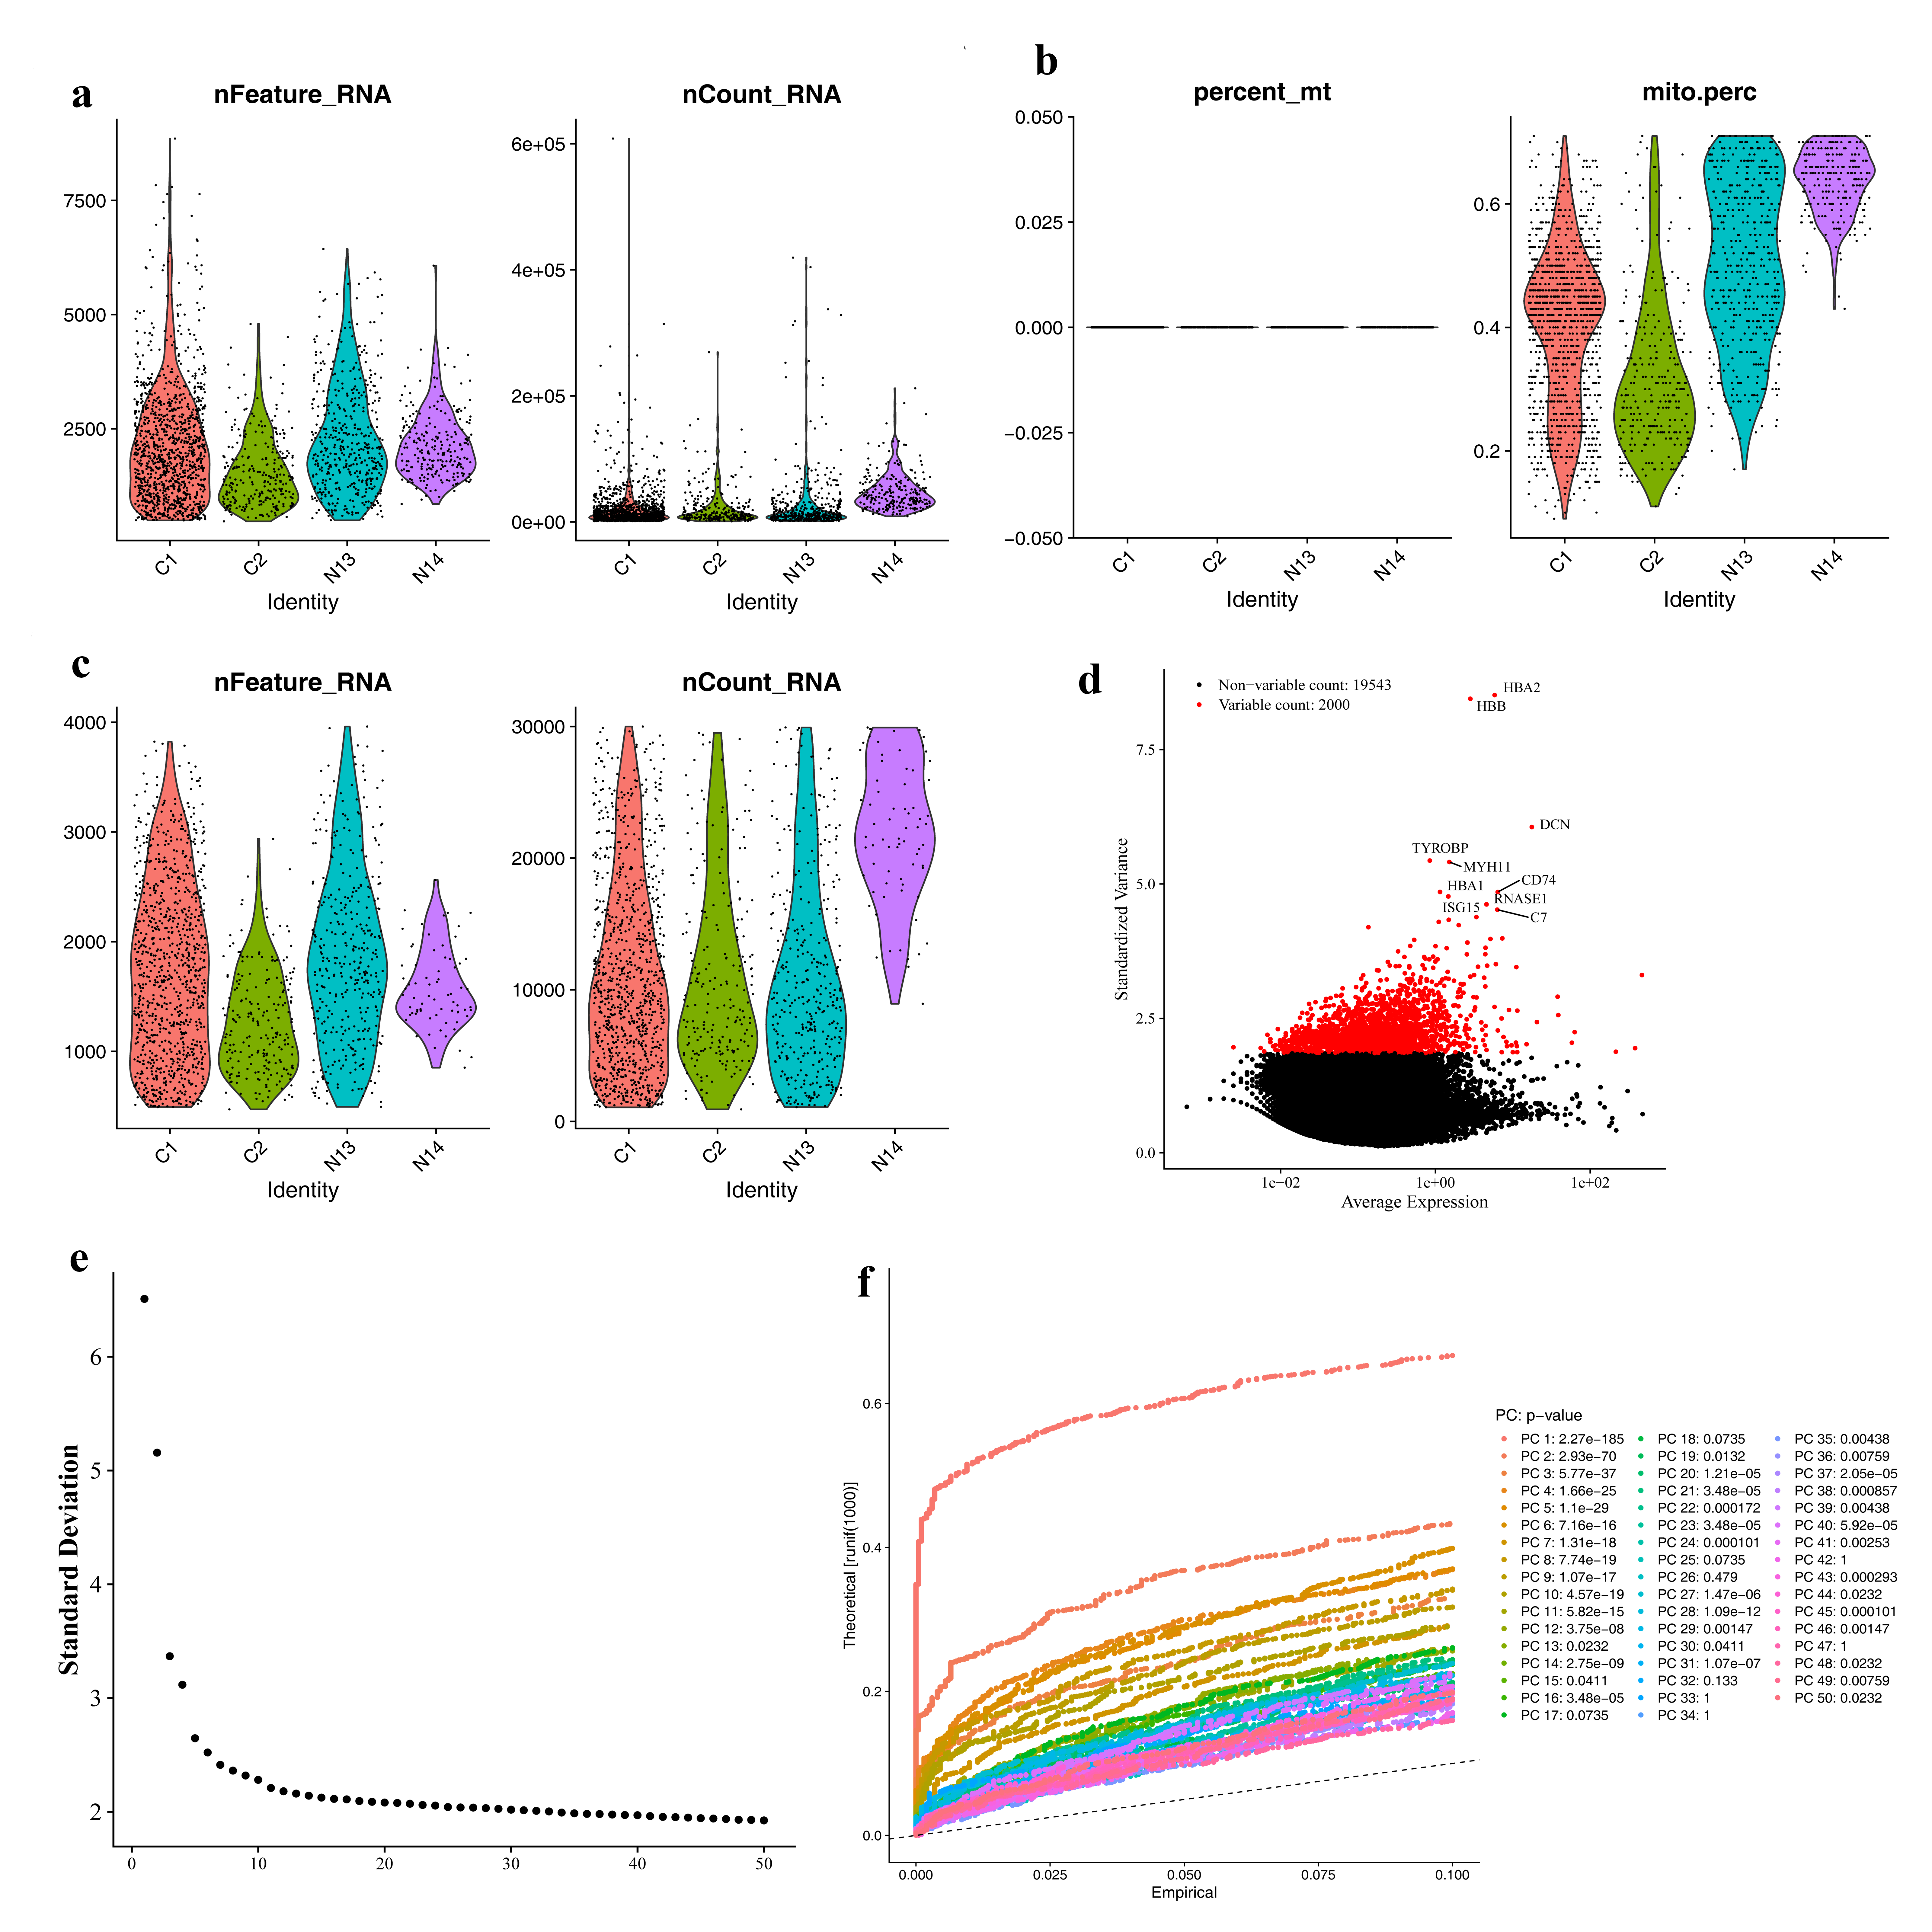
**

**Figure S1 Quality control and preprocessing of single-cell RNA sequencing data.**

1. Violin plots of nFeature_RNA and nCount_RNA in cells before quality control. (b) Violin plot of mitochondrial gene percentage in cells before quality control. (c) Violin plots of nFeature_RNA and nCount_RNA in cells after quality control. The left panel shows the nFeature_RNA distribution in samples N13 and N14 (0-4000), right panel shows nCount_RNA distribution (0-30000). (d) Gene variability analysis plot. (e) Principal component analysis elbow plot. (f) Principal component significance analysis plot.


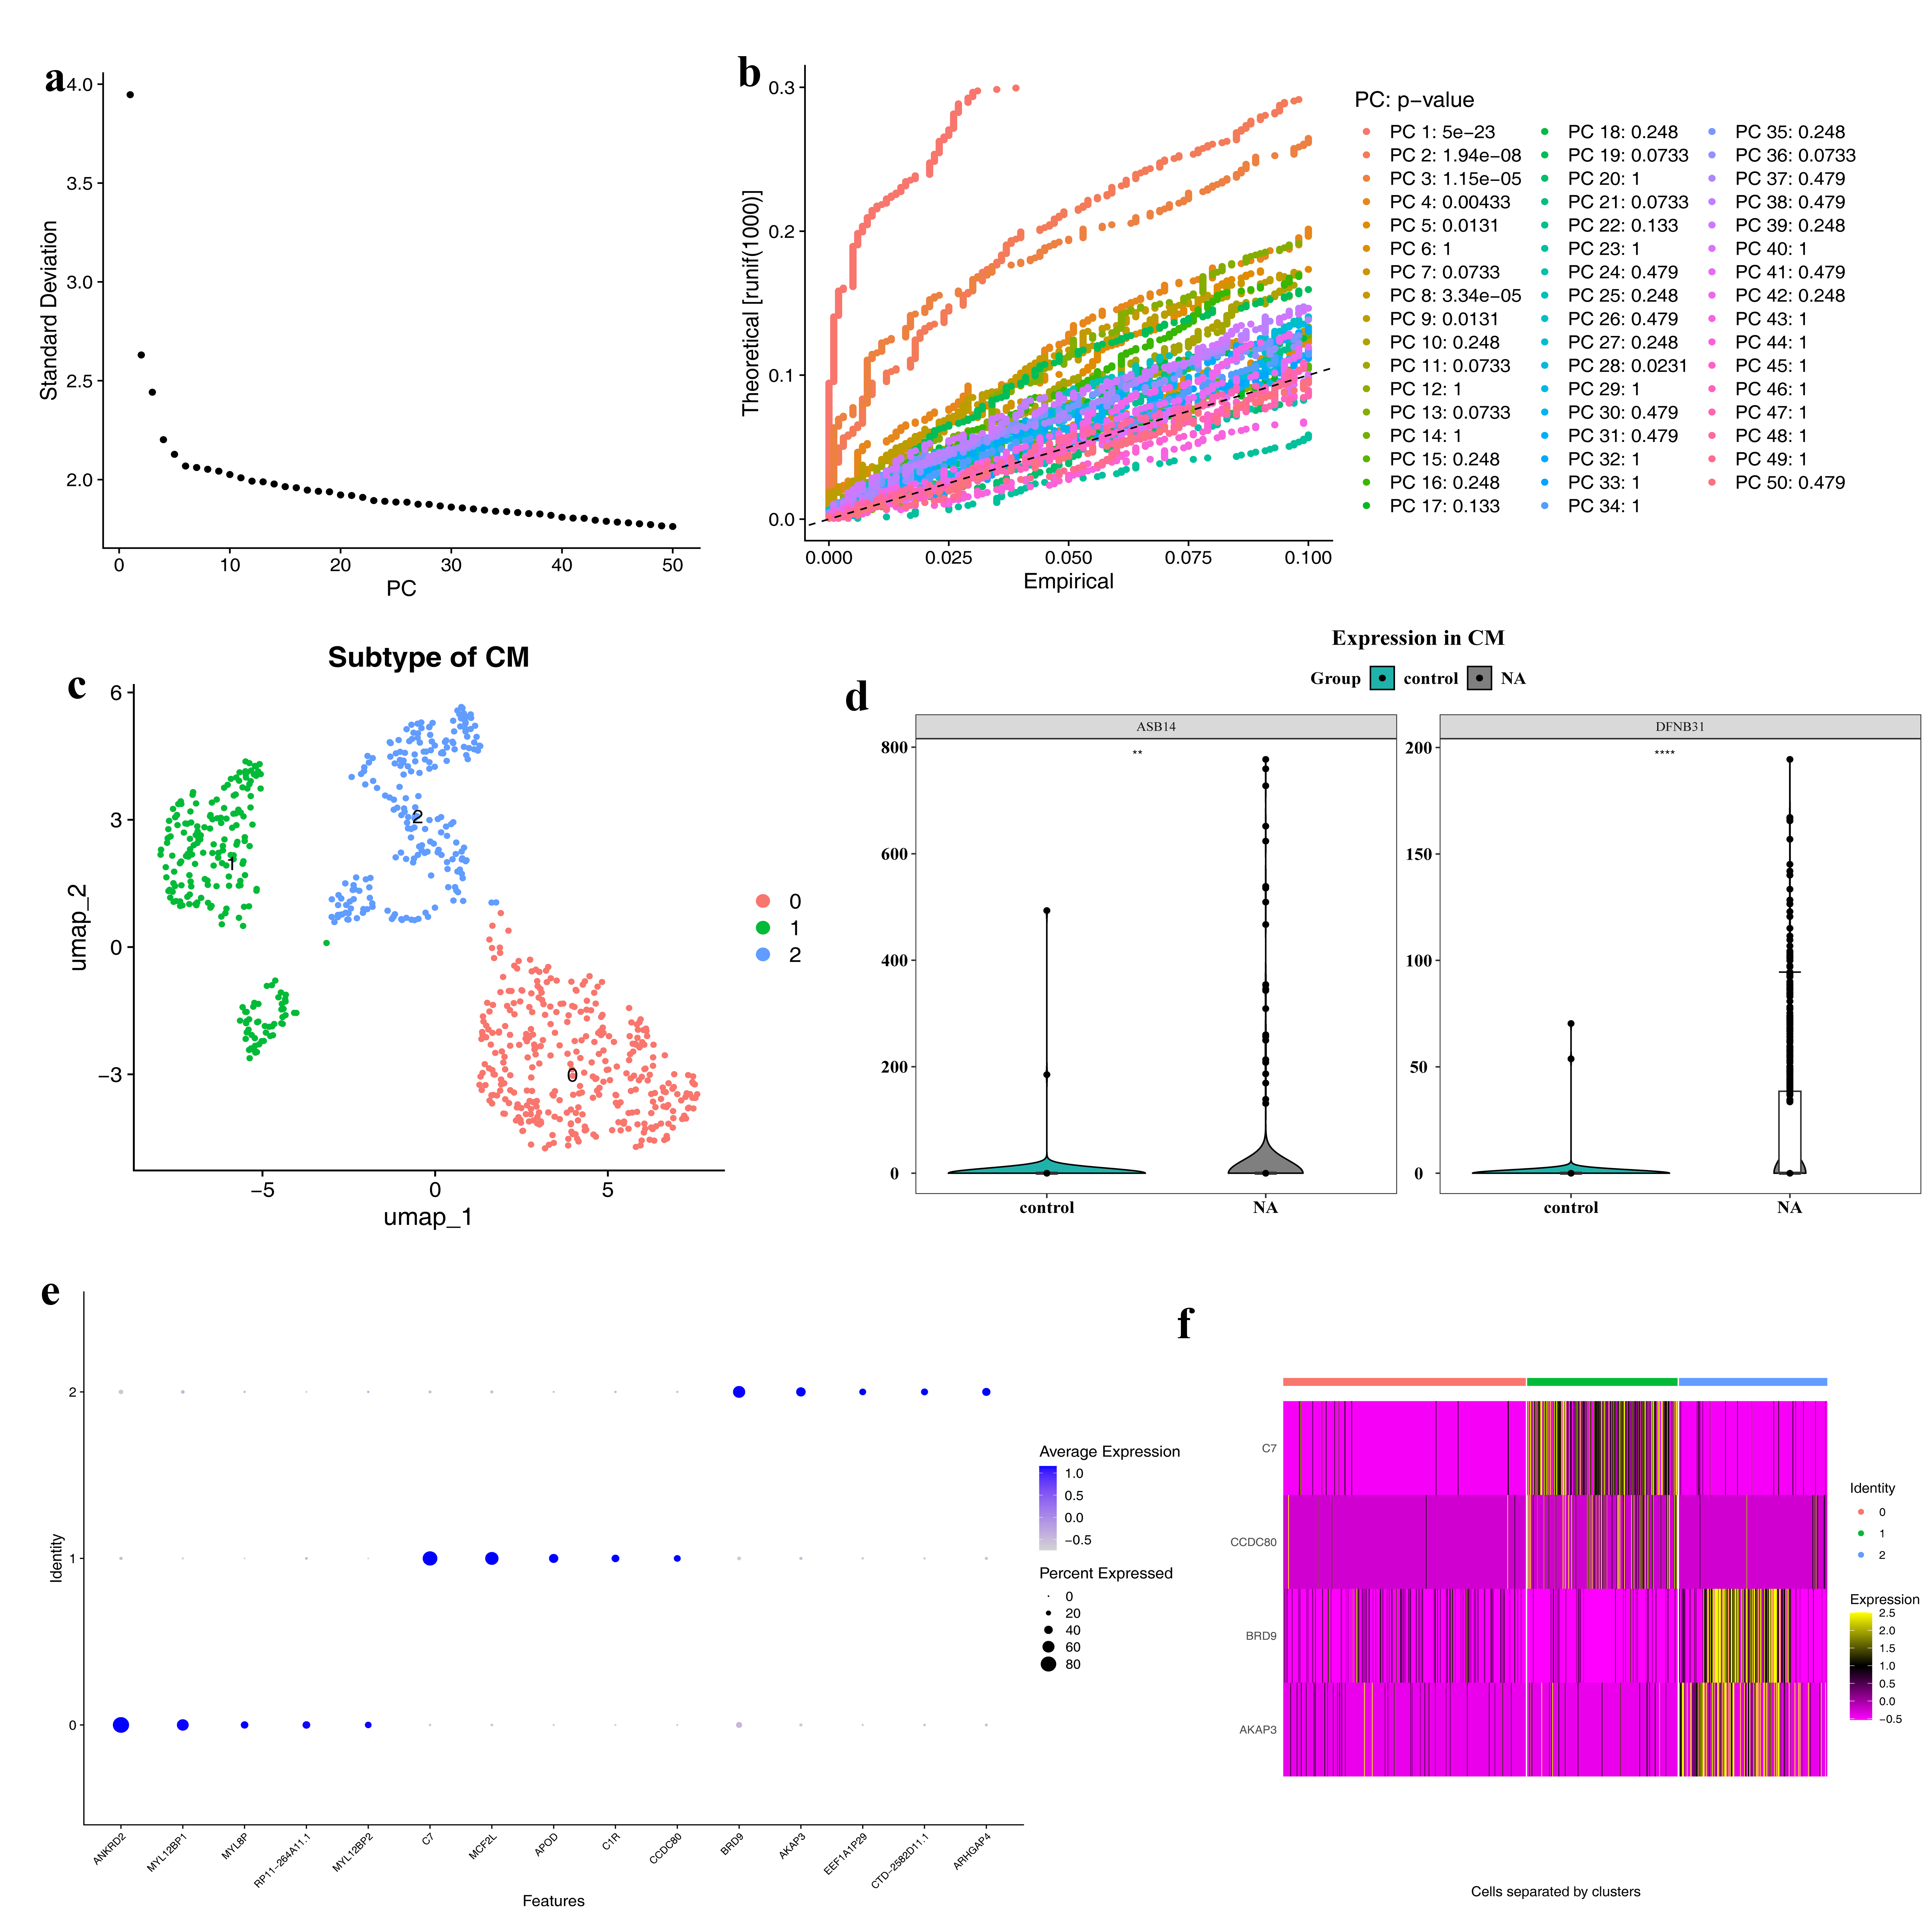


**Figure S2 Cardiomyocyte subtype analysis and marker gene characterization.**

(a) Principal component analysis elbow plot for cardiomyocyte (CM) subtypes. (b) JackStraw test plot for cardiomyocyte subtypes. (c) UMAP distribution plot of cardiomyocyte subtypes. (d) Bar plot of key gene expression in cardiomyocytes showing ASB14 and DFNB31 expression levels in control and NA groups. (e) Dot plot of cardiomyocyte subtype marker genes. (f) Heatmap of top marker genes for cardiomyocyte subtypes. ** indicate p < 0.01, **** indicate p < 0.0001.

**Supplementary Tables**

Supplementary Table 1. Primer sequences for PCR amplification

|  | Temperature | Time |
| --- | --- | --- |
| Pre-denaturation | 98℃ | 1min |
| Denaturation | 98℃ | 10s |
| Annealing | 60℃ | 30s |
| Extension | 72℃ | 30s |

Supplementary Table 2. Significantly enriched cellular component (CC) terms of the 36 candidate genes

| ONTOLOGY | ID | Description | GeneRatio | BgRatio | RichFactor | FoldEnrichment | zScore | pvalue | p.adjust | qvalue | geneID | Count |
| --- | --- | --- | --- | --- | --- | --- | --- | --- | --- | --- | --- | --- |
| CC | GO:0042581 | specific granule | 45806 | 160/19894 | 0.03125 | 21.4375 | 9.917108276868587 | 3.2111474901423297e-6 | 3.2111474901423296e-4 | 2.771727307280748e-4 | CLEC5A/BPI/OLFM4/CEACAM8/CD177 | 5 |
| CC | GO:0070820 | tertiary granule | 45776 | 164/19894 | 0.024390243902439025 | 16.731707317073173 | 7.729280971708066 | 9.003156635837512e-5 | 0.004501578317918756 | 0.003885572863887769 | CLEC5A/OLFM4/CEACAM8/CD177 | 4 |
| CC | GO:0070821 | tertiary granule membrane | 45745 | 73/19894 | 0.0410958904109589 | 28.191780821917806 | 8.892853868471907 | 1.6172988255745306e-4 | 0.005390996085248435 | 0.004653280831477597 | CLEC5A/CEACAM8/CD177 | 3 |
| CC | GO:0035579 | specific granule membrane | 45745 | 91/19894 | 0.03296703296703297 | 22.615384615384613 | 7.896288830763938 | 3.103836463818629e-4 | 0.007759591159546573 | 0.006697752369292831 | CLEC5A/CEACAM8/CD177 | 3 |
| CC | GO:0005766 | primary lysosome | 45745 | 155/19894 | 0.01935483870967742 | 13.27741935483871 | 5.862936915458037 | 0.0014608106235815099 | 0.0243468437263585 | 0.021015170374330493 | BPI/DEFA3/CEACAM8 | 3 |
| CC | GO:0042582 | azurophil granule | 45745 | 155/19894 | 0.01935483870967742 | 13.27741935483871 | 5.862936915458037 | 0.0014608106235815099 | 0.0243468437263585 | 0.021015170374330493 | BPI/DEFA3/CEACAM8 | 3 |

Supplementary Table 3. Significantly enriched KEGG pathways of the 36 candidate genes

| category | subcategory | ID | Description | GeneRatio | BgRatio | RichFactor | FoldEnrichment | zScore | pvalue | p.adjust | qvalue | geneID | Count |
| --- | --- | --- | --- | --- | --- | --- | --- | --- | --- | --- | --- | --- | --- |
| Human Diseases | Substance dependence | hsa05030 | Cocaine addiction | 45731 | 49/9434 | 0.061224489795918366 | 38.50612244897959 | 10.5039154427758 | 5.73475008317514e-5 | 0.00573475008317514 | 0.004768897437587748 | JUN/GRIN2C/GRM2 | 3 |
| Human Diseases | Immune disease | hsa05321 | Inflammatory bowel disease | 45703 | 66/9434 | 0.030303030303030304 | 19.058585858585857 | 5.8748991172931575 | 0.004772864004895257 | 0.08993563103369272 | 0.0747885773859129 | IL12A/JUN | 2 |
| Environmental Information Processing | Signal transduction | hsa04024 | cAMP signaling pathway | 45731 | 226/9434 | 0.01327433628318584 | 8.34867256637168 | 4.462195661155246 | 0.0049881344731970085 | 0.08993563103369272 | 0.0747885773859129 | JUN/PDE4D/GRIN2C | 3 |
| Human Diseases | Substance dependence | hsa05031 | Amphetamine addiction | 45703 | 69/9434 | 0.028985507246376812 | 18.22995169082126 | 5.732220165253987 | 0.005205769669345222 | 0.08993563103369272 | 0.0747885773859129 | JUN/GRIN2C | 2 |
| Human Diseases | Infectious disease: bacterial | hsa05133 | Pertussis | 45703 | 78/9434 | 0.02564102564102564 | 16.126495726495726 | 5.353140869162004 | 0.006608891881546263 | 0.08993563103369272 | 0.0747885773859129 | IL12A/JUN | 2 |
| Human Diseases | Infectious disease: parasitic | hsa05140 | Leishmaniasis | 45703 | 79/9434 | 0.02531645569620253 | 15.922362869198311 | 5.314928109986859 | 0.0067743387686782066 | 0.08993563103369272 | 0.0747885773859129 | IL12A/JUN | 2 |
| Environmental Information Processing | Signal transduction | hsa04012 | ErbB signaling pathway | 45703 | 86/9434 | 0.023255813953488372 | 14.626356589147287 | 5.065680233794007 | 0.007985025733522607 | 0.08993563103369272 | 0.0747885773859129 | JUN/EREG | 2 |
| Human Diseases | Cancer: specific types | hsa05210 | Colorectal cancer | 45703 | 87/9434 | 0.022988505747126436 | 14.45823754789272 | 5.03245433698179 | 0.00816542269076803 | 0.08993563103369272 | 0.0747885773859129 | JUN/EREG | 2 |
| Organismal Systems | Immune system | hsa04658 | Th1 and Th2 cell differentiation | 45703 | 93/9434 | 0.021505376344086023 | 13.525448028673837 | 4.844023103501243 | 0.009286332387830306 | 0.08993563103369272 | 0.0747885773859129 | IL12A/JUN | 2 |
| Environmental Information Processing | Signaling molecules and interaction | hsa04060 | Cytokine-cytokine receptor interaction | 45731 | 298/9434 | 0.010067114093959731 | 6.331543624161073 | 3.732082211528126 | 0.010707131283700029 | 0.08993563103369272 | 0.0747885773859129 | IL12A/TNFSF14/TNFSF15 | 3 |
| Environmental Information Processing | Signal transduction | hsa04010 | MAPK signaling pathway | 45731 | 300/9434 | 0.01 | 6.2893333333333334 | 3.7153455249409846 | 0.010903951857510325 | 0.08993563103369272 | 0.0747885773859129 | JUN/DUSP2/EREG | 3 |
| Human Diseases | Infectious disease: parasitic | hsa05142 | Chagas disease | 45703 | 103/9434 | 0.019417475728155338 | 12.212297734627832 | 4.56580424517392 | 0.011298815914104957 | 0.08993563103369272 | 0.0747885773859129 | IL12A/JUN | 2 |
| Organismal Systems | Immune system | hsa04625 | C-type lectin receptor signaling pathway | 45703 | 105/9434 | 0.01904761904761905 | 11.97968253968254 | 4.514763805127842 | 0.01172256870867862 | 0.08993563103369272 | 0.0747885773859129 | IL12A/JUN | 2 |
| Organismal Systems | Immune system | hsa04620 | Toll-like receptor signaling pathway | 45703 | 109/9434 | 0.01834862385321101 | 11.540061162079512 | 4.416722442934876 | 0.01259098834471698 | 0.08993563103369272 | 0.0747885773859129 | IL12A/JUN | 2 |
| Organismal Systems | Nervous system | hsa04724 | Glutamatergic synapse | 45703 | 116/9434 | 0.017241379310344827 | 10.843678160919541 | 4.256897526918222 | 0.014176940438318394 | 0.09451293625545597 | 0.07859496804401075 | GRIN2C/GRM2 | 2 |
| Human Diseases | Infectious disease: viral | hsa05162 | Measles | 45703 | 139/9434 | 0.014388489208633094 | 9.049400479616308 | 3.815174323888056 | 0.019961012082811393 | 0.12475632551757121 | 0.10374473385145395 | IL12A/JUN | 2 |
| Human Diseases | Infectious disease: viral | hsa05168 | Herpes simplex virus 1 infection | 45703 | 182/9434 | 0.01098901098901099 | 6.911355311355312 | 3.213461450209865 | 0.03295936919878511 | 0.19387864234579477 | 0.1612253973191346 | IL12A/TNFSF14 | 2 |
| Organismal Systems | Immune system | hsa04621 | NOD-like receptor signaling pathway | 45703 | 189/9434 | 0.010582010582010581 | 6.655379188712521 | 3.134060111251149 | 0.03532437707052025 | 0.19624653928066807 | 0.16319449055971344 | JUN/DEFA3 | 2 |
| NA | NA | hsa04082 | Neuroactive ligand signaling | 45703 | 199/9434 | 0.010050251256281407 | 6.320938023450586 | 3.027362569979483 | 0.03881608317322933 | 0.20429517459594385 | 0.16988756624294277 | GRIN2C/GRM2 | 2 |
| Human Diseases | Cardiovascular disease | hsa05417 | Lipid and atherosclerosis | 45703 | 216/9434 | 0.009259259259259259 | 5.823456790123457 | 2.861772225119663 | 0.04504592055481024 | 0.22231615379534542 | 0.18487343315612936 | IL12A/JUN | 2 |
| Metabolism | Glycan biosynthesis and metabolism | hsa00563 | Glycosylphosphatidylinositol (GPI)-anchor biosynthesis | 45672 | 30/9434 | 0.03333333333333333 | 20.964444444444442 | 4.370485612692692 | 0.04668639229702254 | 0.22231615379534542 | 0.18487343315612936 | PGAP1 | 1 |

Supplementary Table 4. GSEA‑enriched KEGG pathways for each of the four biomarkers

| Biomarker | ID | Description | enrichmentScore | NES | pvalue | p.adjust | qvalue |
| --- | --- | --- | --- | --- | --- | --- | --- |
| WHRN | SNARE interactions in vesicular transport | SNARE interactions in vesicular transport | 0.586967293 | 1.814311707 | 4.04E-05 | 0.003654318 | 0.003654318 |
| WHRN | Spliceosome | Spliceosome | 0.462002561 | 1.607997339 | 2.89E-05 | 0.003654318 | 0.003654318 |
| WHRN | Circadian rhythm - mammal | Circadian rhythm - mammal | 0.720001406 | 1.828965941 | 0.00086146 | 0.045901654 | 0.045901654 |
| WHRN | Ribosome | Ribosome | 0.453964882 | 1.530176821 | 0.001014401 | 0.045901654 | 0.045901654 |
| IL12A | Cell cycle | Cell cycle | 0.46604643 | 1.590024698 | 4.31087E-05 | 0.007759569 | 0.007532681 |
| ASB14 | Ribosome | Ribosome | -0.333668238 | -2.041794362 | 5.15E-06 | 0.000932187 | 0.000824033 |
| TMED7‑TICAM2 | Proteasome | Proteasome | 0.641388935 | 2.061351749 | 1.86558E-08 | 3.39536E-06 | 2.51363E-06 |
| TMED7‑TICAM2 | Lysosome | Lysosome | 0.500212971 | 1.751288626 | 5.25944E-08 | 4.78609E-06 | 3.5432E-06 |
| TMED7‑TICAM2 | Huntington's disease | Huntington's disease | 0.452737301 | 1.625200332 | 3.02891E-07 | 1.83754E-05 | 1.36035E-05 |
| TMED7‑TICAM2 | Citrate cycle (TCA cycle) | Citrate cycle (TCA cycle) | 0.684615801 | 2.056308938 | 1.11835E-06 | 5.0885E-05 | 3.76708E-05 |
| TMED7‑TICAM2 | Oxidative phosphorylation | Oxidative phosphorylation | 0.468312915 | 1.645875401 | 2.08503E-06 | 7.58953E-05 | 5.61862E-05 |
| TMED7‑TICAM2 | Propanoate metabolism | Propanoate metabolism | 0.604933227 | 1.866126735 | 5.72986E-05 | 0.001244913 | 0.000921624 |
| TMED7‑TICAM2 | Valine, leucine and isoleucine degradation | Valine, leucine and isoleucine degradation | 0.554114166 | 1.77631635 | 7.3317E-05 | 0.001244913 | 0.000921624 |
| TMED7‑TICAM2 | Peroxisome | Peroxisome | 0.489757002 | 1.655131633 | 6.78659E-05 | 0.001244913 | 0.000921624 |
| TMED7‑TICAM2 | Parkinson's disease | Parkinson's disease | 0.437309572 | 1.536914838 | 5.48323E-05 | 0.001244913 | 0.000921624 |
| TMED7‑TICAM2 | Alzheimer's disease | Alzheimer's disease | 0.426624448 | 1.52787328 | 4.18139E-05 | 0.001244913 | 0.000921624 |
| TMED7‑TICAM2 | Spliceosome | Spliceosome | 0.433360786 | 1.524883112 | 7.5242E-05 | 0.001244913 | 0.000921624 |
| TMED7‑TICAM2 | Apoptosis | Apoptosis | 0.463376027 | 1.581650477 | 0.00020227 | 0.003067756 | 0.002271098 |
| TMED7‑TICAM2 | Ubiquitin mediated proteolysis | Ubiquitin mediated proteolysis | 0.428054455 | 1.511077491 | 0.000219229 | 0.003069207 | 0.002272172 |
| TMED7‑TICAM2 | Pathogenic Escherichia coli infection | Pathogenic Escherichia coli infection | 0.49809398 | 1.627724472 | 0.000411091 | 0.005344181 | 0.003956363 |
| TMED7‑TICAM2 | Mismatch repair | Mismatch repair | 0.599103316 | 1.749374328 | 0.000604326 | 0.007332489 | 0.005428332 |
| TMED7‑TICAM2 | Oocyte meiosis | Oocyte meiosis | 0.425441684 | 1.477999853 | 0.001190902 | 0.013546506 | 0.010028645 |
| TMED7‑TICAM2 | Glycolysis / Gluconeogenesis | Glycolysis / Gluconeogenesis | 0.47432534 | 1.550050782 | 0.001473002 | 0.01576979 | 0.01167457 |
| TMED7‑TICAM2 | Natural killer cell mediated cytotoxicity | Natural killer cell mediated cytotoxicity | 0.403723022 | 1.413469017 | 0.001985369 | 0.020074287 | 0.014861242 |
| TMED7‑TICAM2 | Regulation of actin cytoskeleton | Regulation of actin cytoskeleton | 0.363545085 | 1.314148315 | 0.002534382 | 0.024276709 | 0.017972347 |
| TMED7‑TICAM2 | Circadian rhythm - mammal | Circadian rhythm - mammal | -0.531296418 | -1.908988354 | 0.00274767 | 0.025003793 | 0.018510616 |
| TMED7‑TICAM2 | Fc gamma R-mediated phagocytosis | Fc gamma R-mediated phagocytosis | 0.414403965 | 1.428947046 | 0.003135742 | 0.027176434 | 0.020119049 |
| TMED7‑TICAM2 | N-Glycan biosynthesis | N-Glycan biosynthesis | 0.480792075 | 1.552172188 | 0.003786396 | 0.03132382 | 0.02318941 |
| TMED7‑TICAM2 | Pyruvate metabolism | Pyruvate metabolism | 0.500957169 | 1.579785696 | 0.004173663 | 0.031650274 | 0.023431088 |
| TMED7‑TICAM2 | Epithelial cell signaling in Helicobacter pylori infection | Epithelial cell signaling in Helicobacter pylori infection | 0.448018821 | 1.486043305 | 0.004022591 | 0.031650274 | 0.023431088 |
| TMED7‑TICAM2 | Taste transduction | Taste transduction | -0.292828825 | -1.521048859 | 0.004964654 | 0.036142682 | 0.026756873 |
| TMED7‑TICAM2 | beta-Alanine metabolism | beta-Alanine metabolism | 0.559787275 | 1.612592807 | 0.005265208 | 0.036856456 | 0.027285288 |
| TMED7‑TICAM2 | Other glycan degradation | Other glycan degradation | 0.632683367 | 1.686519829 | 0.005515365 | 0.037026616 | 0.02741126 |
| TMED7‑TICAM2 | Protein export | Protein export | 0.544713461 | 1.590556619 | 0.006103288 | 0.037026616 | 0.02741126 |
| TMED7‑TICAM2 | Vasopressin-regulated water reabsorption | Vasopressin-regulated water reabsorption | 0.482569858 | 1.536554903 | 0.005986924 | 0.037026616 | 0.02741126 |
| TMED7‑TICAM2 | Amyotrophic lateral sclerosis (ALS) | Amyotrophic lateral sclerosis (ALS) | 0.460100371 | 1.500510379 | 0.005844785 | 0.037026616 | 0.02741126 |
| TMED7‑TICAM2 | Vibrio cholerae infection | Vibrio cholerae infection | 0.465423001 | 1.509088854 | 0.006379158 | 0.037451828 | 0.02772605 |
| TMED7‑TICAM2 | Aminoacyl-tRNA biosynthesis | Aminoacyl-tRNA biosynthesis | 0.478722789 | 1.524305417 | 0.007207174 | 0.040990803 | 0.030345997 |
| TMED7‑TICAM2 | Terpenoid backbone biosynthesis | Terpenoid backbone biosynthesis | 0.630223255 | 1.65559288 | 0.008369798 | 0.045556393 | 0.033725959 |
| TMED7‑TICAM2 | Limonene and pinene degradation | Limonene and pinene degradation | 0.669223717 | 1.627692714 | 0.008575372 | 0.045556393 | 0.033725959 |
| TMED7‑TICAM2 | Pyrimidine metabolism | Pyrimidine metabolism | 0.392937995 | 1.359330771 | 0.008760845 | 0.045556393 | 0.033725959 |
